# Supplementary material
Source: HighWire-hosted journal article supplement (https://mbio.asm.org/content/10/4/e01230-19)

**Supplementary Figure S3. ESI(neg)-MS/MS spectra and proposed fragmentation mechanisms for each deprotonated molecule identified in this study.** Fragmentation mechanisms of ferroverdins (compounds 1 to 3) obtained by HCD fragmentation of the molecular ions ( $M^-$ ) 860.12, 876.11 and 904.11 respectively. Fragmentation mechanisms of bagremycins (compounds 4 to 9) were obtained by HCD fragmentation of the molecular ions ( $M-H$ ) $^-$  254.08, 269.09, 415.10, 239.07, 429.11, and 282.08, respectively.

① **Ferroverdin A**, HRESIMS  $m/z$  860.1199 [ $M - H$ ] $^-$  (calcd for  $C_{45}H_{30}N_3O_{12}Fe$ , 860.1173,  $\Delta m = 1.7$  ppm)

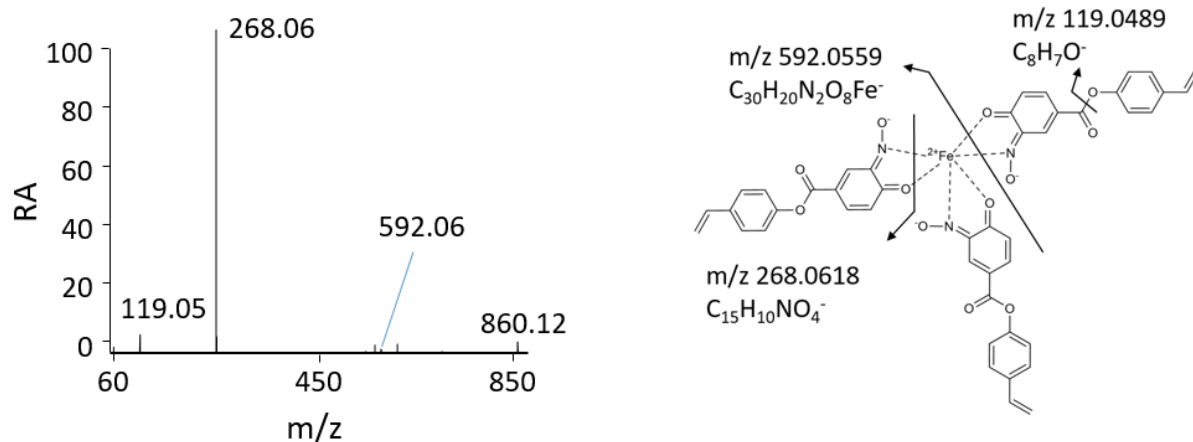

② **Ferroverdin B**, HRESIMS  $m/z$  876.1149 [ $M - H$ ] $^-$  (calcd for  $C_{45}H_{30}N_3O_{13}Fe$ , 876.1123,  $\Delta m = 1.8$  ppm)

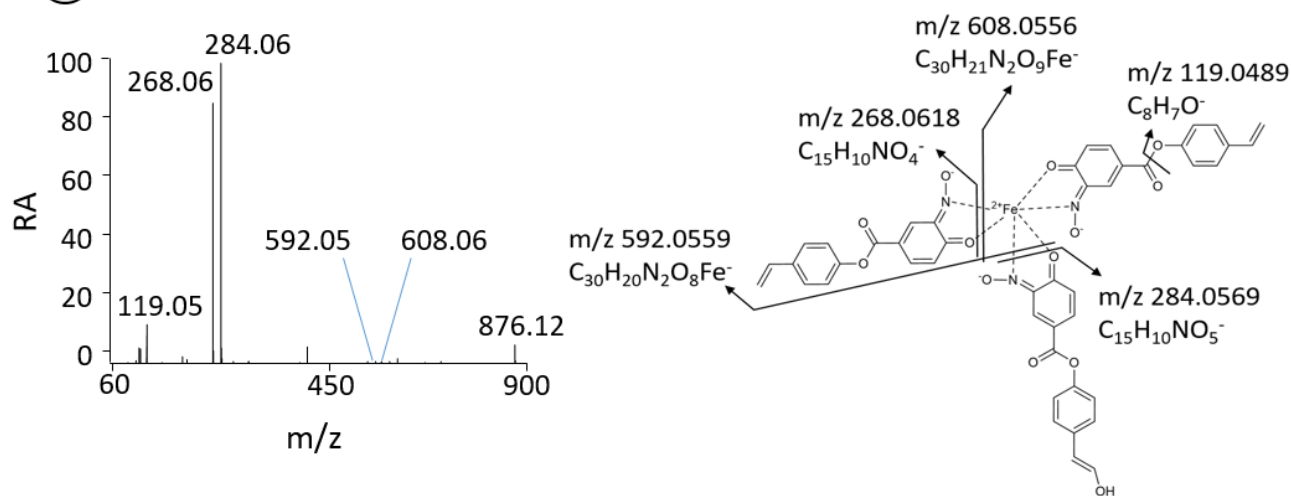

③ **Ferroverdin C**, HRESIMS  $m/z$  904.1099 [ $M - H$ ] $^-$  (calcd for  $C_{46}H_{30}N_3O_{14}Fe$ , 904.1072,  $\Delta m = 1.8$  ppm)

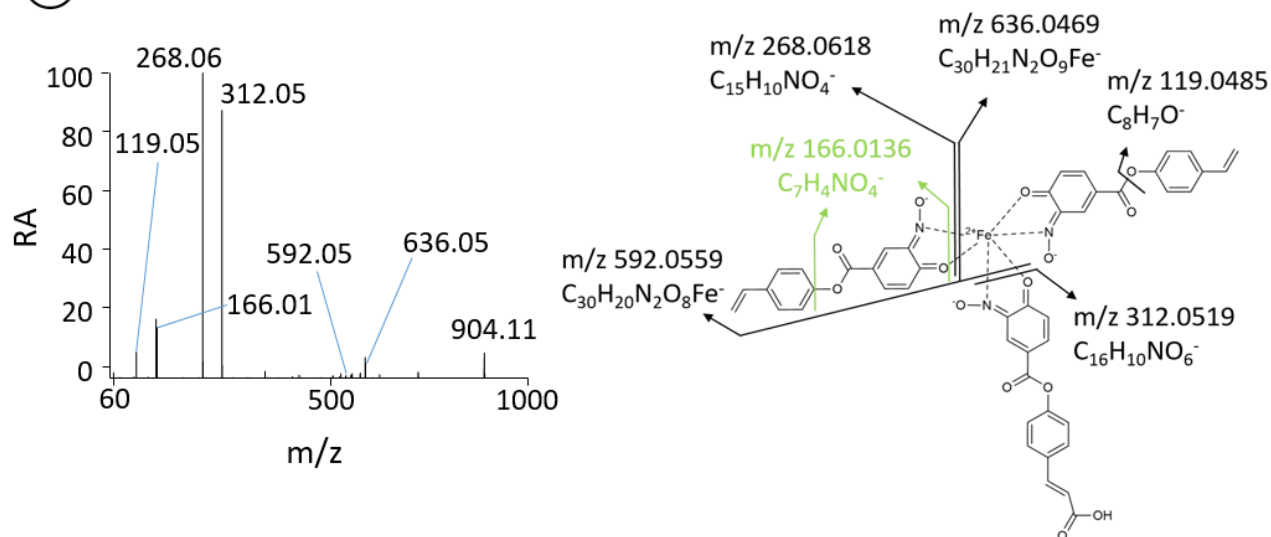

- ④ **Bagremycin A**, HRESIMS  $m/z$  254.0824  $[M - H]^-$  (calcd for  $C_{15}H_{12}NO_3$ , 254.0812,  $\Delta m = 1$  ppm) and  $[M + H]^+$  256.0967 (calcd for  $C_{15}H_{14}NO_3$ , 256.0968,  $\Delta m = 0.3$  ppm)

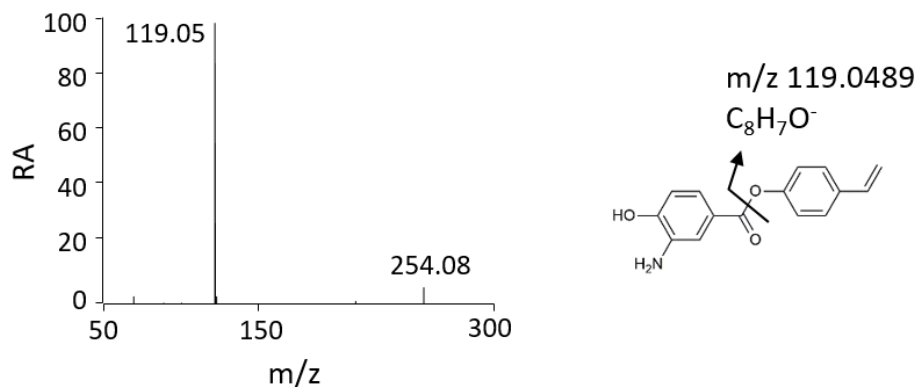

- ⑤ **Bagremycin B**, HRESIMS  $m/z$  296.0931  $[M - H]^-$  (calcd for  $C_{17}H_{14}NO_4$ , 296.0917,  $\Delta m = 1.5$  ppm) and  $[M + H]^+$  298.1073 (calcd for  $C_{17}H_{16}NO_4$ , 298.1074,  $\Delta m = 0.1$  ppm)

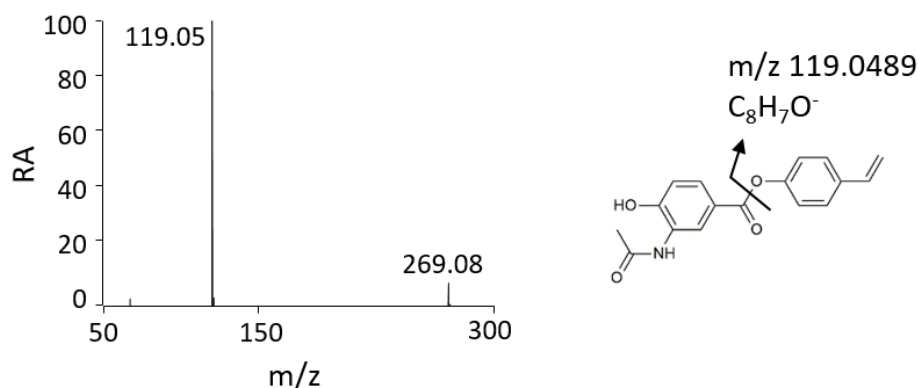

- ⑥ **Bagremycin C**, HRESIMS  $m/z$  415.0974  $[M - H]^-$  (calcd for  $C_{20}H_{19}N_2O_6S$ , 415.0958,  $\Delta m = 2$  ppm) and  $[M + H]^+$  417.1115 (calcd for  $C_{20}H_{21}N_2O_6S$ , 417.1115,  $\Delta m = 0.3$  ppm)

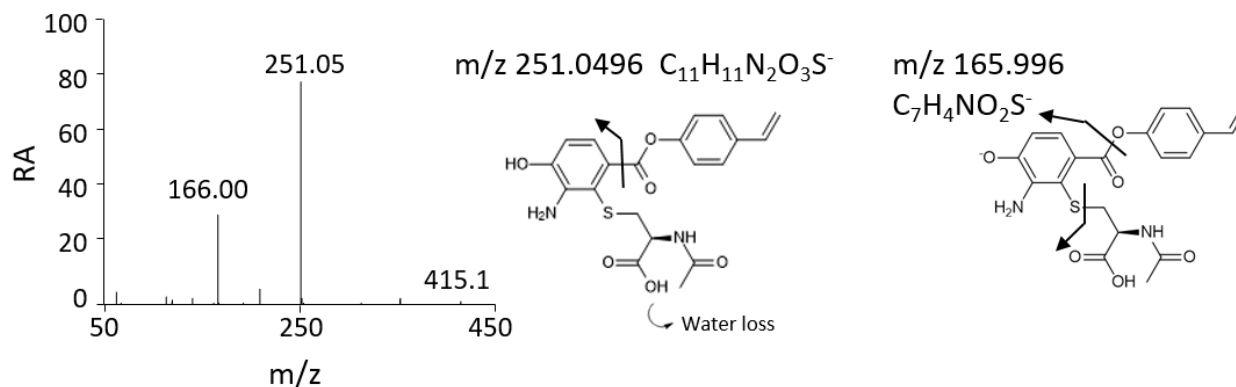

- ⑦ **Bagremycin E**, HRESIMS  $m/z$  239.0714  $[M - H]^-$  (calcd for  $C_{15}H_{10}O_3$ , 239.0703,  $\Delta m = 0.3$  ppm) and  $[M + H]^+$  241.0859 (calcd for  $C_{15}H_{12}NO_3$ , 241.0859,  $\Delta m = 0.3$  ppm)

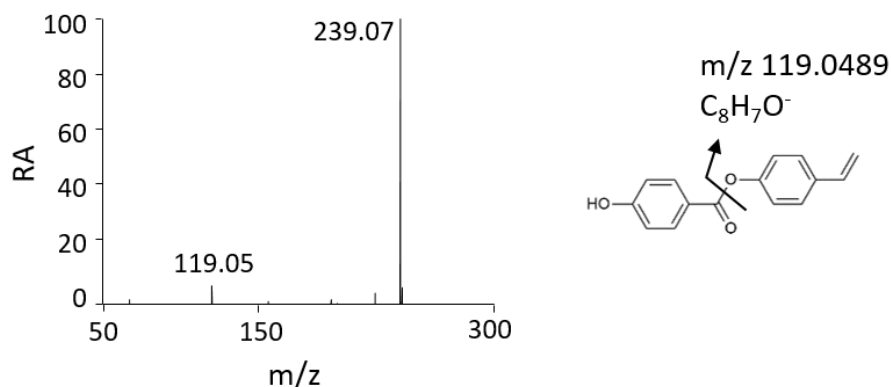

⑧ **Bagremycin F**, HRESIMS  $m/z$  282.0777  $[M - H]^-$  (calcd for  $C_{16}H_{12}NO_4$ , 282.0761,  $\Delta m = 1.9$  ppm)

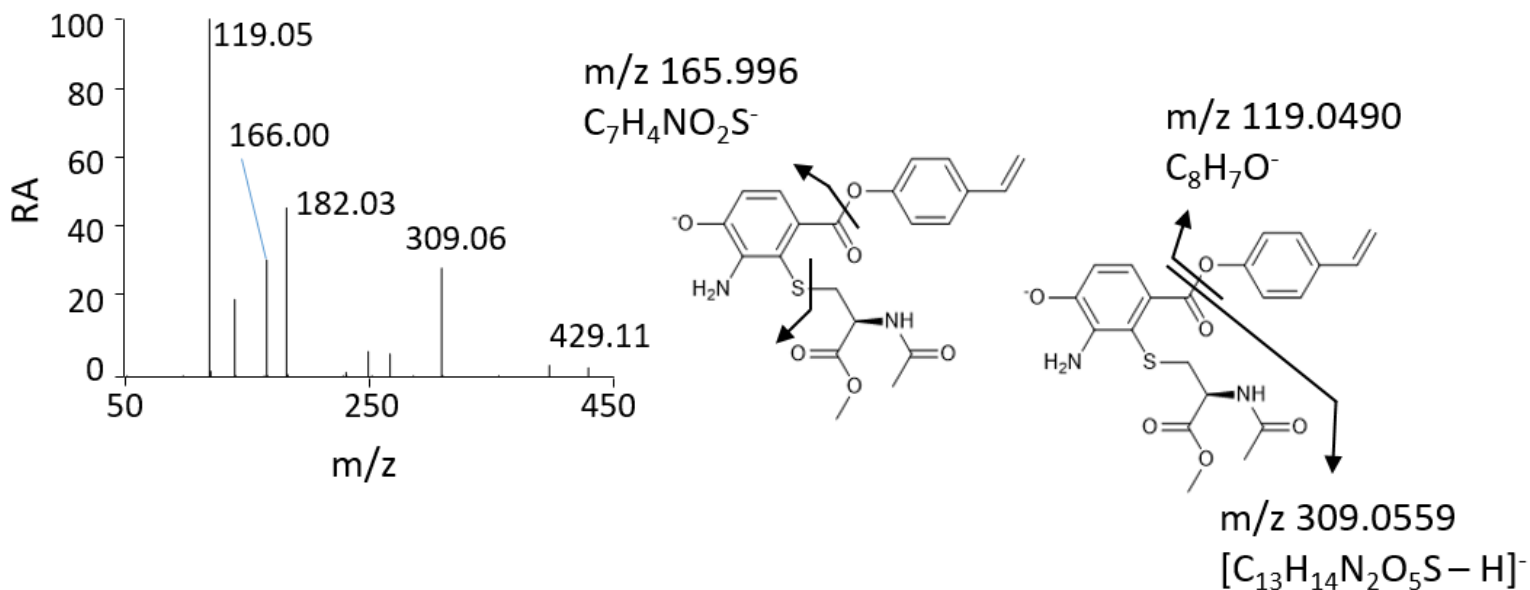

⑨ **Bagremycin G**, HRESIMS  $m/z$  429.1133  $[M - H]^-$  (calcd for  $C_{21}H_{21}N_2O_6S$ , 429.1115,  $\Delta m = 1.6$  ppm)

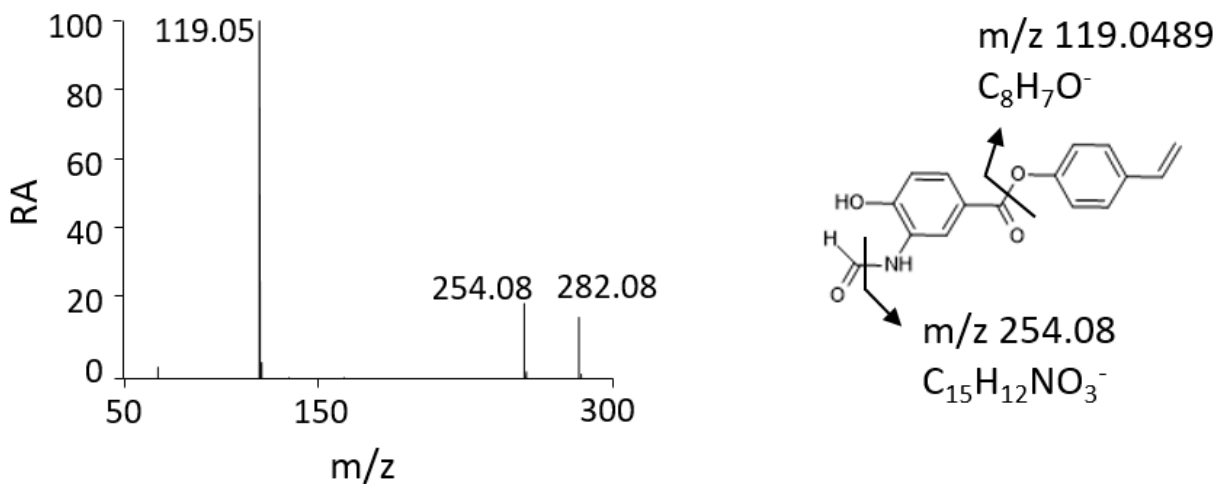

Supplement: inline-supplementary-material-3 [file inline-supplementary-material-3.pdf]
